# Supplementary material for: Novel machine learning model for predicting multiple unplanned hospitalisations
Source: HighWire-hosted journal article supplement (doi:10.1136/bmjhci-2022-100682), 2023-04-01
Supplement: bmjhci-2022-100682supp001_data_supplement.pdf [file bmjhci-2022-100682supp001_data_supplement.pdf]

## Supplemental Material

Table 1: Definition of features used for initial feature selection stage.

| Feature                           | Data Type | Description                                                                         |
|-----------------------------------|-----------|-------------------------------------------------------------------------------------|
| AdmissionAge                      | Integer   | Age of patient at admission.                                                        |
| AdmittedOnWeekend_Flag            | Binary    | 1 if admitted on weekend, 0 otherwise                                               |
| Anxiety_drugs_Flag                | Binary    | 1 if ICD10 diagnosis = Y47 (Drugs for anxiety), 0 otherwise                         |
| Anxiety_organic_Flag              | Binary    | 1 if ICD10 diagnosis = F064 (Organic anxiety disorder), 0 otherwise                 |
| Anxiety_other_Flag                | Binary    | 1 if ICD10 diagnosis = F41 (Other anxiety disorders), 0 otherwise                   |
| Anxiety_phobic_childhood_Flag     | Binary    | 1 if ICD10 diagnosis = F931 (Phobic anxiety disorder of childhood), 0 otherwise     |
| Anxiety_phobic_Flag               | Binary    | 1 if ICD10 diagnosis = F40 (Phobic anxiety disorders), 0 otherwise                  |
| Anxiety_separation_childhood_Flag | Binary    | 1 if ICD10 diagnosis = F930 (Separation anxiety disorder of childhood), 0 otherwise |
| Anxiety_social_childhood_Flag     | Binary    | 1 if ICD10 diagnosis = F932 (Social anxiety disorder of childhood), 0 otherwise     |
| Anxiety_various_Flag              | Binary    | 1 if ICD10 diagnosis = Y47,F41,F40,F93[0-2],F064, 0 otherwise                       |
| BirthCountry_Europe_Flag          | Binary    | 1 if place of birth was in Europe, 0 otherwise                                      |
| BirthRegion_Africa                | Binary    | 1 if born in Africa Region, 0 otherwise                                             |
| BirthRegion_Americas              | Binary    | 1 if born in Americas Region, 0 otherwise                                           |
| BirthRegion_Asia                  | Binary    | 1 if born in Asia Region, 0 otherwise                                               |
| BirthRegion_Europe                | Binary    | 1 if born in Europe Region, 0 otherwise                                             |
| BirthRegion_Polar                 | Binary    | 1 if born in Polar Region, 0 otherwise                                              |
| BirthRegion_Undefined             | Binary    | 1 if born in Undefined Region, 0 otherwise                                          |
| BirthSubRegion_Caribbean          | Binary    | 1 if born in Caribbean, 0 otherwise                                                 |
| BirthSubRegion_Central America    | Binary    | 1 if born in Central America, 0 otherwise                                           |
| BirthSubRegion_Central Asia       | Binary    | 1 if born in Central Asia, 0 otherwise                                              |
| BirthSubRegion_Eastern Africa     | Binary    | 1 if born in Eastern Africa, 0 otherwise                                            |
| BirthSubRegion_Eastern Asia       | Binary    | 1 if born in Eastern Asia, 0 otherwise                                              |
| BirthSubRegion_Eastern Europe     | Binary    | 1 if born in Eastern Europe, 0 otherwise                                            |
| BirthSubRegion_Melanesia          | Binary    | 1 if born in Melanesia, 0 otherwise                                                 |
| BirthSubRegion_Micronesia         | Binary    | 1 if born in Micronesia, 0 otherwise                                                |
| BirthSubRegion_Middle Africa      | Binary    | 1 if born in Middle Africa, 0 otherwise                                             |
| BirthSubRegion_Northern Africa    | Binary    | 1 if born in Northern Africa, 0 otherwise                                           |
| BirthSubRegion_Northern America   | Binary    | 1 if born in Northern America, 0 otherwise                                          |
| BirthSubRegion_Northern Europe    | Binary    | 1 if born in Northern Europe, 0 otherwise                                           |
| BirthSubRegion_Polar              | Binary    | 1 if born in Polar, 0 otherwise                                                     |
| BirthSubRegion_Polynesia          | Binary    | 1 if born in Polynesia, 0 otherwise                                                 |
| BirthSubRegion_South America      | Binary    | 1 if born in South America, 0 otherwise                                             |
| BirthSubRegion_South-Eastern Asia | Binary    | 1 if born in South-Eastern Asia, 0 otherwise                                        |
| BirthSubRegion_Southern Africa    | Binary    | 1 if born in Southern Africa, 0 otherwise                                           |
| BirthSubRegion_Southern Asia      | Binary    | 1 if born in Southern Asia, 0 otherwise                                             |
| BirthSubRegion_Southern Europe    | Binary    | 1 if born in Southern Europe, 0 otherwise                                           |
| BirthSubRegion_Undefined          | Binary    | 1 if born in Undefined, 0 otherwise                                                 |
| BirthSubRegion_Western Africa     | Binary    | 1 if born in Western Africa, 0 otherwise                                            |
| BirthSubRegion_Western Asia       | Binary    | 1 if born in Western Asia, 0 otherwise                                              |
| BirthSubRegion_Western Europe     | Binary    | 1 if born in Western Europe, 0 otherwise                                            |
| ChronicCascad_AffectiveDis_AIHW_1 | Binary    | 1 if ICD diagnosis = (F25, F31, F34, F38, F39)                                      |
| ChronicCascad_Agina_ACSC_2020     | Binary    | 1 if ICD diagnosis = (I20, I240, I248, I249)                                        |
| ChronicCascad_Anxiety_AIHW_1      | Binary    | 1 if ICD diagnosis = (F40, F41)                                                     |

| Feature                              | Data Type | Description                                                                                                                                            |
|--------------------------------------|-----------|--------------------------------------------------------------------------------------------------------------------------------------------------------|
| ChronicCascad_Arthritis_NH_Both_1    | Binary    | 1 if ICD diagnosis = (M13, M08, M09, U862)                                                                                                             |
| ChronicCascad_Asthma_NH_Both_1       | Binary    | 1 if ICD diagnosis = (J45, J46, J82, U833)                                                                                                             |
| ChronicCascad_Bronch_NH_Both_1       | Binary    | 1 if ICD diagnosis = (J47, U834)                                                                                                                       |
| ChronicCascad_CAH_NH_1               | Binary    | 1 if ICD diagnosis = (K703, K746, K701)                                                                                                                |
| ChronicCascad_Cancer_DHHSVic_1       | Binary    | 1 if ICD diagnosis = (C, D00, D01, D02, D03, D04, D05, D06, D07, D08, D09, D37, D38, D39, D40, D41, D42, D43, D44, D45, D46, D47, D48)                 |
| ChronicCascad_CerebP_NH_Both_1       | Binary    | 1 if ICD diagnosis = (G80, U804)                                                                                                                       |
| ChronicCascad_CHF_ACSC_Both_2020     | Binary    | 1 if ICD diagnosis = (I50, J81, I110, U822)                                                                                                            |
| ChronicCascad_COPD_NH_Both_1         | Binary    | 1 if ICD diagnosis = (J20, J40, J41, J42, J43, J44, U832)                                                                                              |
| ChronicCascad_CRF_NH_Both_1          | Binary    | 1 if ICD diagnosis = (J96, P285, U835)                                                                                                                 |
| ChronicCascad_Crohns_NH_Both_1       | Binary    | 1 if ICD diagnosis = (K50, U841)                                                                                                                       |
| ChronicCascad_Cystic_NH_Both_1       | Binary    | 1 if ICD diagnosis = (E84, U782)                                                                                                                       |
| ChronicCascad_Dement_NH_Both_1       | Binary    | 1 if ICD diagnosis = (F00, U791)                                                                                                                       |
| ChronicCascad_Depr_NH_Both_1         | Binary    | 1 if ICD diagnosis = (F0633, F32, F33, U793)                                                                                                           |
| ChronicCascad_Diabetes_NH_1          | Binary    | 1 if ICD diagnosis = (E10, E11, E13, E14)                                                                                                              |
| ChronicCascad_DID_NH_Both_1          | Binary    | 1 if ICD diagnosis = (F84, U794)                                                                                                                       |
| ChronicCascad_DOPA_NH_1              | Binary    | 1 if ICD diagnosis = (K85, K86)                                                                                                                        |
| ChronicCascad_DOPL_NH_1              | Binary    | 1 if ICD diagnosis = (J90, J91, J92, J93, J94) AND (C45)                                                                                               |
| ChronicCascad_DownSynd_NH_Both_1     | Binary    | 1 if ICD diagnosis = (Q90, U882)                                                                                                                       |
| ChronicCascad_Emphy_NH_Both_1        | Binary    | 1 if ICD diagnosis = (J43, U831)                                                                                                                       |
| ChronicCascad_Epilepsy_NH_Both_1     | Binary    | 1 if ICD diagnosis = (G40, U803)                                                                                                                       |
| ChronicCascad_Gout_AIHW_1            | Binary    | 1 if ICD diagnosis = (M10)                                                                                                                             |
| ChronicCascad_Hemip_NH_Both_1        | Binary    | 1 if ICD diagnosis = (G81, U805)                                                                                                                       |
| ChronicCascad_HF_NH_1                | Binary    | 1 if ICD diagnosis = (I42, I43, I50)                                                                                                                   |
| ChronicCascad_HypertenD_ACSC_Both_1  | Binary    | 1 if ICD diagnosis = (I10, I119, U823)                                                                                                                 |
| ChronicCascad_IHD_NH_Both_1          | Binary    | 1 if ICD diagnosis = (I20, I21, I22, I23, I24, I25, U821)                                                                                              |
| ChronicCascad_KD_NH_Both_1           | Binary    | 1 if ICD diagnosis = (N00, N01, N02, N03, N04, N05, N06, N07, N08, N09, N10, N11, N12, N13, N14, N15, N16, N17, N18, N19, I131, I132, I139, I12, U871) |
| ChronicCascad_LiverFailure_NH_Both_1 | Binary    | 1 if ICD diagnosis = (K71, U843)                                                                                                                       |
| ChronicCascad_Lupus_NH_Both_1        | Binary    | 1 if ICD diagnosis = (L93, M32, U863)                                                                                                                  |
| ChronicCascad_MS_NH_Both_1           | Binary    | 1 if ICD diagnosis = (G35, U802)                                                                                                                       |
| ChronicCascad_NIEC_NH_1              | Binary    | 1 if ICD diagnosis = (K50, K51, K52)                                                                                                                   |
| ChronicCascad_Obes_NH_Both_1         | Binary    | 1 if ICD diagnosis = (E66, U781)                                                                                                                       |
| ChronicCascad_Osteoa_NH_1            | Binary    | 1 if ICD diagnosis = (M15, M16, M17, M18, M19, M47)                                                                                                    |
| ChronicCascad_Osteop_Both_1          | Binary    | 1 if ICD diagnosis = (M80, M81, M82, U864)                                                                                                             |
| ChronicCascad_Parkinson_NH_1         | Binary    | 1 if ICD diagnosis = (G20, U801)                                                                                                                       |
| ChronicCascad_RheuA_NH_Both_1        | Binary    | 1 if ICD diagnosis = (M05, M06, M45, M080, U861)                                                                                                       |
| ChronicCascad_RheuHD_ACSC_2020       | Binary    | 1 if ICD diagnosis = (I00, I01, I02, I05, I06, I07, I08, I09)                                                                                          |
| ChronicCascad_Schizo_NH_Both_1       | Binary    | 1 if ICD diagnosis = (F20, U792)                                                                                                                       |
| ChronicCascad_SpinaB_NH_Both_1       | Binary    | 1 if ICD diagnosis = (Q05, U881)                                                                                                                       |
| ChronicCascad_Stroke_NH_1            | Binary    | 1 if ICD diagnosis = (I60, I61, I62, I63, I64)                                                                                                         |
| ChronicCascad_SubstandDis_AIHW_1     | Binary    | 1 if ICD diagnosis = (F55, F19)                                                                                                                        |
| ChronicCascad_Ulcerative_NH_Both_1   | Binary    | 1 if ICD diagnosis = (K51, U842)                                                                                                                       |
| Comorb_Charlson_Weighted             | Integer   | Weighted Charlson score (1)                                                                                                                            |
| Comorb_Elixhauser_Weighted           | Integer   | Weighted Elixhauser score (1)                                                                                                                          |
| ComplexityWithCCC                    | Integer   | Number of body system treated in episode with total number of body systems impacted by cascading chronic conditions                                    |
| Depression_episode_Flag              | Binary    | Depressive episode, 1 if icd10 diagnosis =F32, 0 otherwise                                                                                             |

| Feature                                         | Data Type | Description                                                                                                                                                        |
|-------------------------------------------------|-----------|--------------------------------------------------------------------------------------------------------------------------------------------------------------------|
| Depression_organic_Flag                         | Binary    | Organic depressive disorder, 1 if icd10 diagnosis =F0633, 0 otherwise                                                                                              |
| Depression_post_schizo_Flag                     | Binary    | Post-schizophrenic depression, 1 if icd10 diagnosis =F204, 0 otherwise                                                                                             |
| Depression_recurrent_Flag                       | Binary    | Recurrent depressive disorder, 1 if icd10 diagnosis =F33, 0 otherwise                                                                                              |
| Depression_various_Flag                         | Binary    | Depressive conditions, 1 if icd10 diagnosis =F204,F3[2-3],F33,F0633, 0 otherwise                                                                                   |
| ExpectedLOS_LOS_var_<=-3 to <-1                 | Binary    | 1 if actual LOS of episode is between -3 and -1 standard deviations from expected LOS for given condition, 0 otherwise.                                            |
| ExpectedLOS_LOS_var_<=1 to <3                   | Binary    | 1 if actual LOS of episode is between 1 and 3 standard deviations from expected LOS for given condition, 0 otherwise.                                              |
| ExpectedLOS_LOS_var_<=3                         | Binary    | 1 if actual LOS of episode is less than 3 standard deviations from expected LOS for given condition, 0 otherwise.                                                  |
| ExpectedLOS_LOS_var_>=3                         | Binary    | 1 if actual LOS of episode is equal or greater than 3 standard deviations from expected LOS for given condition, 0 otherwise.                                      |
| HAC_total                                       | Integer   | Number of Hospital Acquired Complications in episode                                                                                                               |
| MaritalStatus_DevelopedWidowedSeparated_Flag    | Binary    | 1 if divorced, widowed or separated, 0 otherwise.                                                                                                                  |
| NumOf_Past_Unplanned_HLCC_None_001_0to180Days   | Integer   | Number of clinically related unplanned admissions 180 days prior to index admission for Chest Pain (CRG 001)                                                       |
| NumOf_Past_Unplanned_HLCC_None_001_0to30Days    | Integer   | Number of clinically related unplanned admissions 30 days prior to index admission for Chest Pain (CRG 001)                                                        |
| NumOf_Past_Unplanned_HLCC_None_001_0to365Days   | Integer   | Number of clinically related unplanned admissions 365 days prior to index admission for Chest Pain (CRG 001)                                                       |
| NumOf_Past_Unplanned_HLCC_None_001_0to7Days     | Integer   | Number of clinically related unplanned admissions 7 days prior to index admission for Chest Pain (CRG 001)                                                         |
| NumOf_Past_Unplanned_HLCC_None_001_181to270Days | Integer   | Number of clinically related unplanned admissions between 181 to 270 days prior to index admission for Chest Pain (CRG 001)                                        |
| NumOf_Past_Unplanned_HLCC_None_001_271to365Days | Integer   | Number of clinically related unplanned admissions between 271 to 365 days prior to index admission for Chest Pain (CRG 001)                                        |
| NumOf_Past_Unplanned_HLCC_None_001_91to180Days  | Integer   | Number of clinically related unplanned admissions between 91 to 180 days prior to index admission for Chest Pain (CRG 001)                                         |
| NumOf_Past_Unplanned_HLCC_None_004_0to180Days   | Integer   | Number of clinically related unplanned admissions 180 days prior to index admission for Arrhythmia, Cardiac Arrest & Conduction Disorders (CRG 004)                |
| NumOf_Past_Unplanned_HLCC_None_004_0to30Days    | Integer   | Number of clinically related unplanned admissions 30 days prior to index admission for Arrhythmia, Cardiac Arrest & Conduction Disorders (CRG 004)                 |
| NumOf_Past_Unplanned_HLCC_None_004_0to365Days   | Integer   | Number of clinically related unplanned admissions 365 days prior to index admission for Arrhythmia, Cardiac Arrest & Conduction Disorders (CRG 004)                |
| NumOf_Past_Unplanned_HLCC_None_004_0to7Days     | Integer   | Number of clinically related unplanned admissions 7 days prior to index admission for Arrhythmia, Cardiac Arrest & Conduction Disorders (CRG 004)                  |
| NumOf_Past_Unplanned_HLCC_None_004_181to270Days | Integer   | Number of clinically related unplanned admissions between 181 to 270 days prior to index admission for Arrhythmia, Cardiac Arrest & Conduction Disorders (CRG 004) |
| NumOf_Past_Unplanned_HLCC_None_004_271to365Days | Integer   | Number of clinically related unplanned admissions between 271 to 365 days prior to index admission for Arrhythmia, Cardiac Arrest & Conduction Disorders (CRG 004) |
| NumOf_Past_Unplanned_HLCC_None_004_91to180Days  | Integer   | Number of clinically related unplanned admissions between 91 to 180 days prior to index admission for Arrhythmia, Cardiac Arrest & Conduction Disorders (CRG 004)  |
| NumOf_Past_Unplanned_HLCC_None_005_0to180Days   | Integer   | Number of clinically related unplanned admissions 180 days prior to index admission for Invasive Procedure W/O AMI (CRG 005)                                       |
| NumOf_Past_Unplanned_HLCC_None_005_0to30Days    | Integer   | Number of clinically related unplanned admissions 30 days prior to index admission for Invasive Procedure W/O AMI (CRG 005)                                        |
| NumOf_Past_Unplanned_HLCC_None_005_0to365Days   | Integer   | Number of clinically related unplanned admissions 365 days prior to index admission for Invasive Procedure W/O AMI (CRG 005)                                       |
| NumOf_Past_Unplanned_HLCC_None_005_0to7Days     | Integer   | Number of clinically related unplanned admissions 7 days prior to index admission for Invasive Procedure W/O AMI (CRG 005)                                         |
| NumOf_Past_Unplanned_HLCC_None_005_181to270Days | Integer   | Number of clinically related unplanned admissions between 181 to 270 days prior to index admission for Invasive Procedure W/O AMI (CRG 005)                        |

| Feature                                         | Data Type | Description                                                                                                                                                                            |
|-------------------------------------------------|-----------|----------------------------------------------------------------------------------------------------------------------------------------------------------------------------------------|
| NumOf_Past_Unplanned_HLCC_None_005_271to365Days | Integer   | Number of clinically related unplanned admissions between 271 to 365 days prior to index admission for Invasive Procedure W/O AMI (CRG 005)                                            |
| NumOf_Past_Unplanned_HLCC_None_005_91to180Days  | Integer   | Number of clinically related unplanned admissions between 91 to 180 days prior to index admission for Invasive Procedure W/O AMI (CRG 005)                                             |
| NumOf_Past_Unplanned_HLCC_None_006_0to180Days   | Integer   | Number of clinically related unplanned admissions 180 days prior to index admission for Other Clinical Cardiology (CRG 006)                                                            |
| NumOf_Past_Unplanned_HLCC_None_006_0to30Days    | Integer   | Number of clinically related unplanned admissions 30 days prior to index admission for Other Clinical Cardiology (CRG 006)                                                             |
| NumOf_Past_Unplanned_HLCC_None_006_0to365Days   | Integer   | Number of clinically related unplanned admissions 365 days prior to index admission for Other Clinical Cardiology (CRG 006)                                                            |
| NumOf_Past_Unplanned_HLCC_None_006_0to7Days     | Integer   | Number of clinically related unplanned admissions 7 days prior to index admission for Other Clinical Cardiology (CRG 006)                                                              |
| NumOf_Past_Unplanned_HLCC_None_006_181to270Days | Integer   | Number of clinically related unplanned admissions between 181 to 270 days prior to index admission for Other Clinical Cardiology (CRG 006)                                             |
| NumOf_Past_Unplanned_HLCC_None_006_271to365Days | Integer   | Number of clinically related unplanned admissions between 271 to 365 days prior to index admission for Other Clinical Cardiology (CRG 006)                                             |
| NumOf_Past_Unplanned_HLCC_None_006_91to180Days  | Integer   | Number of clinically related unplanned admissions between 91 to 180 days prior to index admission for Other Clinical Cardiology (CRG 006)                                              |
| NumOf_Past_Unplanned_HLCC_None_007_0to180Days   | Integer   | Number of clinically related unplanned admissions 180 days prior to index admission for Invasive Cardiac Investigative Procedures with AMI (CRG 007)                                   |
| NumOf_Past_Unplanned_HLCC_None_007_0to30Days    | Integer   | Number of clinically related unplanned admissions 30 days prior to index admission for Invasive Cardiac Investigative Procedures with AMI (CRG 007)                                    |
| NumOf_Past_Unplanned_HLCC_None_007_0to365Days   | Integer   | Number of clinically related unplanned admissions 365 days prior to index admission for Invasive Cardiac Investigative Procedures with AMI (CRG 007)                                   |
| NumOf_Past_Unplanned_HLCC_None_007_0to7Days     | Integer   | Number of clinically related unplanned admissions 7 days prior to index admission for Invasive Cardiac Investigative Procedures with AMI (CRG 007)                                     |
| NumOf_Past_Unplanned_HLCC_None_007_181to270Days | Integer   | Number of clinically related unplanned admissions between 181 to 270 days prior to index admission for Invasive Cardiac Investigative Procedures with AMI (CRG 007)                    |
| NumOf_Past_Unplanned_HLCC_None_007_271to365Days | Integer   | Number of clinically related unplanned admissions between 271 to 365 days prior to index admission for Invasive Cardiac Investigative Procedures with AMI (CRG 007)                    |
| NumOf_Past_Unplanned_HLCC_None_007_91to180Days  | Integer   | Number of clinically related unplanned admissions between 91 to 180 days prior to index admission for Invasive Cardiac Investigative Procedures with AMI (CRG 007)                     |
| NumOf_Past_Unplanned_HLCC_None_I50_0to180Days   | Integer   | Number of clinically related unplanned admissions 180 days prior to index admission for Invasive Cardiac Investigative Procedures with Heart Failure (I50 ICD10 3-char)                |
| NumOf_Past_Unplanned_HLCC_None_I50_0to30Days    | Integer   | Number of clinically related unplanned admissions 30 days prior to index admission for Invasive Cardiac Investigative Procedures with Heart Failure (I50 ICD10 3-char)                 |
| NumOf_Past_Unplanned_HLCC_None_I50_0to365Days   | Integer   | Number of clinically related unplanned admissions 365 days prior to index admission for Invasive Cardiac Investigative Procedures with Heart Failure (I50 ICD10 3-char)                |
| NumOf_Past_Unplanned_HLCC_None_I50_0to7Days     | Integer   | Number of clinically related unplanned admissions 7 days prior to index admission for Invasive Cardiac Investigative Procedures with Heart Failure (I50 ICD10 3-char)                  |
| NumOf_Past_Unplanned_HLCC_None_I50_181to270Days | Integer   | Number of clinically related unplanned admissions between 181 to 270 days prior to index admission for Invasive Cardiac Investigative Procedures with Heart Failure (I50 ICD10 3-char) |
| NumOf_Past_Unplanned_HLCC_None_I50_271to365Days | Integer   | Number of clinically related unplanned admissions between 271 to 365 days prior to index admission for Invasive Cardiac Investigative Procedures with Heart Failure (I50 ICD10 3-char) |
| NumOf_Past_Unplanned_HLCC_None_I50_91to180Days  | Integer   | Number of clinically related unplanned admissions between 91 to 180 days prior to index admission for Invasive Cardiac Investigative Procedures with Heart Failure (I50 ICD10 3-char)  |
| NumOfED_NonAdmitted_180Days                     | Integer   | Calculated for past 180 days from discharge                                                                                                                                            |
| NumOfED_NonAdmitted_270Days                     | Integer   | Calculated for past 270 days from discharge                                                                                                                                            |
| NumOfED_NonAdmitted_30Days                      | Integer   | Calculated for past 30 days from discharge                                                                                                                                             |

| Feature                                   | Data Type | Description                                                                                                                            |
|-------------------------------------------|-----------|----------------------------------------------------------------------------------------------------------------------------------------|
| NumOfED_NonAdmitted_365Days               | Integer   | Calculated for past 365 days from discharge                                                                                            |
| NumOfED_NonAdmitted_3Days                 | Integer   | Calculated for past 3 days from discharge                                                                                              |
| NumOfED_NonAdmitted_60Days                | Integer   | Calculated for past 60 days from discharge                                                                                             |
| NumOfED_NonAdmitted_7Days                 | Integer   | Calculated for past 7 days from discharge                                                                                              |
| NumOfED_NonAdmitted_90Days                | Integer   | Calculated for past 90 days from discharge                                                                                             |
| NumOfHIPs_CHSP_12Month_0Lag               | Integer   | Number of enrolments in any Hospital Independence Program (HIP), Commonwealth Home Support Program (CHSP) stream for past 12 months    |
| NumOfHIPs_CHSP_6Month_0Lag                | Integer   | Number of enrolments in any Hospital Independence Program (HIP), Commonwealth Home Support Program (CHSP) stream for past 6 months     |
| NumOfHIPs_DuringSep_CHSP                  | Integer   | Number of HIP, Commonwealth Home Support Program (CHSP) stream patient was on during unplanned episode.                                |
| NumOfHIPs_DuringSep_HACC                  | Integer   | Number of HIP, Home and Community Care (HACC) stream patient was on during unplanned episode.                                          |
| NumOfHIPs_DuringSep_HARP                  | Integer   | Number of HIP, Hospital Admission Risk Programs (HARP) stream patient was on during unplanned episode.                                 |
| NumOfHIPs_DuringSep_NDIS                  | Integer   | Number of HIP, National Disability Insurance Scheme (NDIS) stream patient was on during unplanned episode.                             |
| NumOfHIPs_DuringSep_PAC                   | Integer   | Number of HIP, Post Acute Care (PAC) stream patient was on during unplanned episode.                                                   |
| NumOfHIPs_DuringSep_ResidentialInReach    | Integer   | Number of HIP, Residential In Reach stream patient was on during unplanned episode                                                     |
| NumOfHIPs_DuringSep_SACS                  | Integer   | Number of HIP, Sub Acute Ambulatory Care Services (SACS) stream patient was on during unplanned episode                                |
| NumOfHIPs_DuringSep_Total                 | Integer   | Total Number of HIP patient was on during unplanned episode                                                                            |
| NumOfHIPs_HACC_12Month_0Lag               | Integer   | Number of enrolments in any Hospital Independence Program (HIP), Home and Community Care (HACC) stream for past 12 months              |
| NumOfHIPs_HACC_6Month_0Lag                | Integer   | Number of enrolments in any Hospital Independence Program (HIP), Home and Community Care (HACC) stream for past 6 months               |
| NumOfHIPs_HARP_12Month_0Lag               | Integer   | Number of enrolments in any Hospital Independence Program (HIP), Hospital Admission Risk Programs (HARP) stream for past 12 months     |
| NumOfHIPs_HARP_6Month_0Lag                | Integer   | Number of enrolments in any Hospital Independence Program (HIP), Hospital Admission Risk Programs (HARP) stream for past 6 months      |
| NumOfHIPs_NDIS_12Month_0Lag               | Integer   | Number of enrolments in any Hospital Independence Program (HIP), National Disability Insurance Scheme (NDIS) stream for past 12 months |
| NumOfHIPs_NDIS_6Month_0Lag                | Integer   | Number of enrolments in any Hospital Independence Program (HIP), National Disability Insurance Scheme (NDIS) stream for past 6 months  |
| NumOfHIPs_PAC_12Month_0Lag                | Integer   | Number of enrolments in any Hospital Independence Program (HIP), Post Acute Care (PAC) stream for past 12 months                       |
| NumOfHIPs_PAC_6Month_0Lag                 | Integer   | Number of enrolments in any Hospital Independence Program (HIP), Post Acute Care (PAC) stream for past 6 months                        |
| NumOfHIPs_ResidentialInReach_12Month_0Lag | Integer   | Number of enrolments in any Hospital Independence Program (HIP), Residential Inreach Program stream for past 12 months                 |
| NumOfHIPs_ResidentialInReach_6Month_0Lag  | Integer   | Number of enrolments in any Hospital Independence Program (HIP), Residential Inreach Program stream for past 6 months                  |
| NumOfHIPs_SACS_12Month_0Lag               | Integer   | Number of enrolments in any Sub Acute Ambulatory Care Services (SACS) stream for past 12 months                                        |
| NumOfHIPs_SACS_6Month_0Lag                | Integer   | Number of enrolments in any Sub Acute Ambulatory Care Services (SACS) stream for past 6 months                                         |
| NumOfHIPs_Total_12Month_0Lag              | Integer   | Total Number of enrolments in HIP in past 12 months                                                                                    |
| NumOfHIPs_Total_6Month_0Lag               | Integer   | Number of enrolments in any Hospital Independence Program (HIP) group for past 180 days                                                |
| NumOfOutpatientAttended_180Days           | Integer   | In past 180 days from IP discharge.                                                                                                    |
| NumOfOutpatientAttended_270Days           | Integer   | In past 270 days from IP discharge.                                                                                                    |
| NumOfOutpatientAttended_30Days            | Integer   | In past 30 days from IP discharge.                                                                                                     |
| NumOfOutpatientAttended_365Days           | Integer   | In past 365 days from IP discharge.                                                                                                    |
| NumOfOutpatientAttended_60Days            | Integer   | In past 60 days from IP discharge.                                                                                                     |
| NumOfOutpatientAttended_90Days            | Integer   | In past 90 days from IP discharge.                                                                                                     |

| Feature                                                  | Data Type | Description                                                                                                              |
|----------------------------------------------------------|-----------|--------------------------------------------------------------------------------------------------------------------------|
| Outpatient_FailedToAttendRatio_180Days                   | Float     | Calculated for past 180 days from discharge.                                                                             |
| Outpatient_FailedToAttendRatio_270Days                   | Float     | Calculated for past 270 days from discharge.                                                                             |
| Outpatient_FailedToAttendRatio_30Days                    | Float     | Calculated for past 30 days from discharge.                                                                              |
| Outpatient_FailedToAttendRatio_365Days                   | Float     | Calculated for past 365 days from discharge.                                                                             |
| Outpatient_FailedToAttendRatio_60Days                    | Float     | Calculated for past 60 days from discharge.                                                                              |
| Outpatient_FailedToAttendRatio_90Days                    | Float     | Calculated for past 90 days from discharge.                                                                              |
| Outpatient_NeverBooked_180Days                           | Binary    | No OP bookings in past 180 days.                                                                                         |
| Outpatient_NeverBooked_365Days                           | Binary    | No OP bookings in past year.                                                                                             |
| PatientUsualAccomm_AgeCare_Alone_Flag                    | Binary    | Living in Age Care or Alone.                                                                                             |
| Pot_Avoidable_Emergency_Admit                            | Binary    | Patient had avoidable emergency admission according to set of ICD10 diagnosis code defined in (2)                        |
| SEIFA_Decile_Within_Australia                            | Integer   | ABS Socio-Economic Index For Advantage, Index of Relative Socio-economic Advantage and Disadvantage (0-poor, 10-wealthy) |
| surgflag                                                 | Binary    | Patient had surgery during episode.                                                                                      |
| TotalLOSDays_Unplanned_PastDisch_skip0days_14dayswindow  | Integer   | Calculated for past 14days from discharge.                                                                               |
| TotalLOSDays_Unplanned_PastDisch_skip0days_180dayswindow | Integer   | Calculated for past 180days from discharge.                                                                              |
| TotalLOSDays_Unplanned_PastDisch_skip0days_270dayswindow | Integer   | Calculated for past 270days from discharge.                                                                              |
| TotalLOSDays_Unplanned_PastDisch_skip0days_30dayswindow  | Integer   | Calculated for past 30days from discharge.                                                                               |
| TotalLOSDays_Unplanned_PastDisch_skip0days_365dayswindow | Integer   | Calculated for past 365days from discharge.                                                                              |
| TotalLOSDays_Unplanned_PastDisch_skip0days_3dayswindow   | Integer   | Calculated for past 3days from discharge.                                                                                |
| TotalLOSDays_Unplanned_PastDisch_skip0days_60dayswindow  | Integer   | Calculated for past 60days from discharge.                                                                               |
| TotalLOSDays_Unplanned_PastDisch_skip0days_7dayswindow   | Integer   | Calculated for past 7days from discharge.                                                                                |
| TotalLOSDays_Unplanned_PastDisch_skip0days_90dayswindow  | Integer   | Calculated for past 90days from discharge.                                                                               |

## References

1. Gasparini A. comorbidity: An R package for computing comorbidity scores. *J Open Source Softw.* 2018 Mar 30;3(23):648.
2. Martin C, Stockman K, Hinkley N, Campbell D. Multimorbidity and Acute Potentially Preventable Diagnoses in HealthLinks Chronic Care (HLCC) Dandenong Cohort. A work in evolution. *Int J Integr Care.* 2021 Feb 26;20(3):173.
